# Supplementary material
Source: PubMed Central journal article supplement (PMC5179323)
Supplement: NIHMS794972-supplement-01.pdf [file NIHMS794972-supplement-01.pdf]

**Supplement 1:** Categorization of the Global Burden of Disease study conditions as 1) conditions that, if not diagnosed and treated within hours to days of onset, commonly lead to serious physical or mental disability or death, 2) conditions with trajectories that can involve acute decompensation, that lead many patients to experience serious physical or mental disability or death, and 3) non-emergency conditions. Abbreviations: communicable disease (CD), noncommunicable disease (NCD), trauma (T).

| NCD/CD                                                                             | Conditions                                                |
|------------------------------------------------------------------------------------|-----------------------------------------------------------|
| <b>Category 1: Conditions that must be addressed within hours to days of onset</b> |                                                           |
| CD                                                                                 | Dengue                                                    |
| CD                                                                                 | Diarrheal diseases                                        |
| CD                                                                                 | Encephalitis                                              |
| CD                                                                                 | Endocarditis                                              |
| CD                                                                                 | Lower respiratory infections                              |
| CD                                                                                 | Malaria                                                   |
| CD                                                                                 | Maternal sepsis                                           |
| CD                                                                                 | Meningitis                                                |
| CD                                                                                 | Rabies                                                    |
| CD                                                                                 | Sepsis and other infectious disorders of the newborn baby |
| CD                                                                                 | Tetanus                                                   |
| CD                                                                                 | Typhoid and paratyphoid fevers                            |
| CD                                                                                 | Yellow fever                                              |
| NCD                                                                                | Abortion                                                  |
| NCD                                                                                | Acute glomerulonephritis                                  |
| NCD                                                                                | Appendicitis                                              |
| NCD                                                                                | Atrial fibrillation and flutter                           |
| NCD                                                                                | Cerebrovascular disease                                   |
| NCD                                                                                | Epilepsy                                                  |
| NCD                                                                                | Hypertensive disorders of pregnancy                       |
| NCD                                                                                | Ischemic heart disease                                    |
| NCD                                                                                | Ischemic stroke                                           |
| NCD                                                                                | Maternal hemorrhage                                       |
| NCD                                                                                | Neonatal encephalopathy (birth asphyxia and birth trauma) |
| NCD                                                                                | Obstructed labor                                          |
| NCD                                                                                | Paralytic ileus and intestinal obstruction without hernia |
| NCD                                                                                | Poisonings                                                |
| NCD                                                                                | Preterm birth complications                               |
| T                                                                                  | Animal contact                                            |
| T                                                                                  | Collective violence and legal intervention                |
| T                                                                                  | Drowning                                                  |
| T                                                                                  | Exposure to forces of nature                              |
| T                                                                                  | Exposure to mechanical forces                             |
| T                                                                                  | Falls                                                     |
| T                                                                                  | Fire, heat and hot substances                             |
| T                                                                                  | Interpersonal violence                                    |
| T                                                                                  | Other transport injury                                    |
| T                                                                                  | Road injury                                               |
| T                                                                                  | Self-harm                                                 |
| T                                                                                  | Unintentional injuries not classified elsewhere           |
| <b>Category 2: Conditions commonly associated with acute decompensations</b>       |                                                           |
| CD                                                                                 | African Trypanosomiasis                                   |
| CD                                                                                 | Chagas disease                                            |
| CD                                                                                 | Cysticercosis                                             |
| CD                                                                                 | Diphtheria                                                |
| CD                                                                                 | Echinococcosis                                            |
| CD                                                                                 | Food-borne trematodiasis                                  |
| CD                                                                                 | Hepatitis                                                 |
| CD                                                                                 | HIV/AIDS                                                  |
| CD                                                                                 | Intestinal nematode infections                            |
| CD                                                                                 | Leishmaniasis                                             |
| CD                                                                                 | Measles                                                   |

1  
2  
3  
4  
5  
6  
7  
8  
9  
10  
11  
12  
13  
14  
15  
16  
17  
18  
19  
20  
21  
22  
23  
24  
25  
26  
27  
28  
29  
30  
31  
32  
33  
34  
35  
36  
37  
38  
39  
40  
41  
42  
43  
44  
45  
46  
47  
48  
49  
50  
51  
52  
53  
54  
55  
56  
57  
58  
59  
60

|     |                                                     |
|-----|-----------------------------------------------------|
| CD  | Onchocerciasis                                      |
| CD  | Otitis media                                        |
| CD  | Schistosomiasis                                     |
| CD  | Sexually transmitted diseases excluding HIV         |
| CD  | Trachoma                                            |
| CD  | Tuberculosis                                        |
| CD  | Upper respiratory infections                        |
| CD  | Urinary tract infection                             |
| CD  | Varicella                                           |
| CD  | Whooping cough                                      |
| NCD | Adverse effects of medical treatment                |
| NCD | Alcohol use disorders                               |
| NCD | Aortic aneurysm                                     |
| NCD | Asthma                                              |
| NCD | Bipolar affective disorder                          |
| NCD | Brain and nervous system cancers                    |
| NCD | Cardiomyopathy and myocarditis                      |
| NCD | Chronic kidney diseases                             |
| NCD | Chronic obstructive pulmonary disease               |
| NCD | Cirrhosis of the liver secondary to alcohol use     |
| NCD | Cirrhosis of the liver secondary to hepatitis B     |
| NCD | Cirrhosis of the liver secondary to hepatitis C     |
| NCD | Colon and rectum cancers                            |
| NCD | Diabetes mellitus                                   |
| NCD | Drug use disorders                                  |
| NCD | Eating disorders                                    |
| NCD | Esophageal cancer                                   |
| NCD | Gall bladder and bile duct disease                  |
| NCD | Gastritis and duodenitis                            |
| NCD | Gynecological diseases                              |
| NCD | Hemoglobinopathies and hemolytic anemias            |
| NCD | Hypertensive heart disease                          |
| NCD | Inguinal or femoral hernia                          |
| NCD | Interstitial lung disease and pulmonary sarcoidosis |
| NCD | Iodine deficiency                                   |
| NCD | Iron-deficiency anemia                              |
| NCD | Larynx cancer                                       |
| NCD | Leukemia                                            |
| NCD | Low back and neck pain                              |
| NCD | Mouth cancer                                        |
| NCD | Multiple myeloma                                    |
| NCD | Nasopharynx cancer                                  |
| NCD | Pancreatitis                                        |
| NCD | Peptic ulcer disease                                |
| NCD | Peripheral vascular disease                         |
| NCD | Pneumoconiosis                                      |
| NCD | Protein-energy malnutrition                         |
| NCD | Rheumatic heart disease                             |
| NCD | Schizophrenia                                       |
| NCD | Skin and subcutaneous diseases                      |
| NCD | Stomach cancer                                      |
| NCD | Trachea, bronchus, and lung cancers                 |
| NCD | Unipolar depressive disorders                       |
| NCD | Urolithiasis                                        |
| NCD | Vascular disorders of intestine                     |

### Category 3: Non-emergency conditions

|     |                                         |
|-----|-----------------------------------------|
| CD  | Leprosy                                 |
| CD  | Lymphatic filariasis                    |
| NCD | Alzheimer's disease and other dementias |
| NCD | Anxiety disorders                       |
| NCD | Benign prostatic hyperplasia            |

|    |     |                                                           |
|----|-----|-----------------------------------------------------------|
| 1  | NCD | Bladder cancer                                            |
| 2  | NCD | Breast cancer                                             |
| 3  | NCD | Cancer of other part of pharynx and oropharynx            |
| 4  | NCD | Cervical cancer                                           |
| 5  | NCD | Childhood behavioral disorders                            |
| 6  | NCD | Congenital anomalies                                      |
| 7  | NCD | Gallbladder and biliary tract cancer                      |
| 8  | NCD | Gout                                                      |
| 9  | NCD | Hodgkin's disease                                         |
| 10 | NCD | Idiopathic intellectual disability                        |
| 11 | NCD | Kidney and other urinary organ cancers                    |
| 12 | NCD | Liver cancer                                              |
| 13 | NCD | Malignant melanoma of skin                                |
| 14 | NCD | Migraine                                                  |
| 15 | NCD | Multiple sclerosis                                        |
| 16 | NCD | Non-Hodgkin lymphoma                                      |
| 17 | NCD | Non-infective inflammatory bowel disease                  |
| 18 | NCD | Non-melanoma skin cancer                                  |
| 19 | NCD | Osteoarthritis                                            |
| 20 | NCD | Ovarian cancer                                            |
| 21 | NCD | Pancreatic cancer                                         |
| 22 | NCD | Parkinson's disease                                       |
| 23 | NCD | Pervasive development disorders                           |
| 24 | NCD | Prostate cancer                                           |
| 25 | NCD | Rheumatoid arthritis                                      |
| 26 | NCD | Sudden infant death syndrome                              |
| 27 | NCD | Tension-type headache                                     |
| 28 | NCD | Testicular cancer                                         |
| 29 | NCD | Thyroid cancer                                            |
| 30 | NCD | Uterine cancer                                            |
| 31 | NCD | Vitamin A deficiency                                      |
| 32 |     | Oral disorders                                            |
| 33 |     | Other cardiovascular and circulatory diseases             |
| 34 |     | Other chronic respiratory diseases                        |
| 35 |     | Other cirrhosis of the liver                              |
| 36 |     | Other digestive diseases                                  |
| 37 |     | Other endocrine, nutritional, blood, and immune disorders |
| 38 |     | Other infectious diseases                                 |
| 39 |     | Other maternal disorders                                  |
| 40 |     | Other mental and behavioral disorders                     |
| 41 |     | Other musculoskeletal disorders                           |
| 42 |     | Other neglected tropical diseases                         |
| 43 |     | Other neonatal disorders                                  |
| 44 |     | Other neoplasms                                           |
| 45 |     | Other neurological disorders                              |
| 46 |     | Other nutritional deficiencies                            |
| 47 |     | Sense organ diseases                                      |
| 48 |     |                                                           |
| 49 |     |                                                           |
| 50 |     |                                                           |
| 51 |     |                                                           |
| 52 |     |                                                           |
| 53 |     |                                                           |
| 54 |     |                                                           |
| 55 |     |                                                           |
| 56 |     |                                                           |
| 57 |     |                                                           |
| 58 |     |                                                           |
| 59 |     |                                                           |
| 60 |     |                                                           |
